# Supplementary material for: MKRN3 inhibits the reproductive axis through actions in kisspeptin-expressing neurons
Source: JCI journal article supplement (doi:10.1172/jci136564), 2020-05-14
Supplement: sd1 [file 1]

### Brain regions shown in Figure 3

MnPo: median preoptic nucleus, VOLT: vascular organ of the lamina terminalis. AVPV: anteroventral periventricular nucleus, VOLT: vascular organ of the lamina terminalis, H: hippocampus, DMH: dorsomedial nucleus of hypothalamus, ARC: arcuate nucleus, VMN: ventromedial nucleus, PLCo: posterolateral cortical amygdaloid nucleus, BMP: accessory basal amygdaloid nucleus, PH: posterior hypothalamic area, PMV: premammillary nucleus, ventral part, PMCo: posteromedial cortical amygdaloid nucleus, LV: lateral ventricle.

### Supplementary Table 1: Primers used in this study

For qPCR

| Species       | Gene         | Accession #    | Forward Primer                     | Reverse Primer                | Amplicon (bp) |
|---------------|--------------|----------------|------------------------------------|-------------------------------|---------------|
| Rhesus Monkey | <i>MKRN3</i> | XM_001106523.3 | CAAGAGTAAATGTGGCAGAGT<br>GAAAGGAGA | TGAAGGGGAAGGAGGGAAAGAA<br>CAA | 147           |
|               | <i>GAPDH</i> | NM_001195426.1 | AAGGGCATCCTGGGCTACA                | GAAGAGTGGGTGTCGCTGTTG         | 68            |
| Rat           | <i>Mkrm3</i> | XM_218735.9    | AGAGGGAAGCGTGCTGTTA                | AGCCTTAGCAGACCAGACCA          | 205           |
|               | <i>Ppia</i>  | M19533.1       | GGCAAATGCTGGACCAAAACAC<br>AA       | GGTAAAATGCCCGCAAGTCAAAG<br>A  | 222           |
| Mouse         | <i>Mkrm3</i> | NM_011746.3    | AAGCGCATACTGGCATCAAG               | AGCCAACGGTCATCAGAGAA          | 165           |
|               | <i>Rpl19</i> | NM_009078.2    | CTGAAGGTCAAAGGGAATGTG              | GGACAGAGTCTTGATGATCTC         | 195           |

For single cell RT-PCR

| Species | Gene         | Accession # | Forward Primer       | Reverse Primer       | Amplicon (bp) |
|---------|--------------|-------------|----------------------|----------------------|---------------|
| Mouse   | <i>Mkrm3</i> | NM_011746   | GAAGTTGCTTTGCCTGAGAG | ATGCCACAGCGTGATACTAC | 113           |
|         | <i>Kiss1</i> | NM_178260   | TGCTGCTTCTCCTCTGT    | ACCGCGATTCTTTTCC     | 120           |

For ChIP

| Species | Gene         | Accession # | Forward Primer               | Reverse Primer               | Position<br>from TSS | Amplicon<br>(bp) |
|---------|--------------|-------------|------------------------------|------------------------------|----------------------|------------------|
| Human   | <i>KISS1</i> | NM_002256   | GTGCCCTTCTCCTCCCCTC<br>TTCCT | GACCCATCCTGCCCCCA<br>AACAA   | -401/-244            | 158              |
|         | <i>TAC3</i>  | NM_013251   | GCTCGGGTGCTGTTAGGAA<br>ATGGT | GGGGGAGGAGGATGCA<br>GACAGTAG | -178/-87             | 92               |

## Supplementary Table 2: Promoters used in this study

The table below describes the genomic location of every sequence used in the promoter assays (\* in reference to the transcriptional start site)

| Gene Promoter | Species | Accession #    | From* | To   |
|---------------|---------|----------------|-------|------|
| <i>KISS1</i>  | Human   | NM_002256.3    | -1317 | +22  |
| <i>TAC3</i>   | Human   | NM_001178054.1 | -766  | +69  |
| <i>Tcf1</i>   | Rat     | XM_006233882.3 | -5180 | +1   |
| <i>Vglut2</i> | Rat     | NM_053427      | -1113 | -57  |
| <i>Viaat1</i> | Rat     | NM_031782      | -1148 | +1   |
| <i>Eed</i>    | Rat     | NM_001106278.2 | -1850 | +256 |
| <i>EAP1</i>   | Human   | NM_024496.4    | -2345 | +399 |
| <i>PDYN</i>   | Human   | NM_001190892.1 | -450  | +340 |

## Supplementary Figure 1

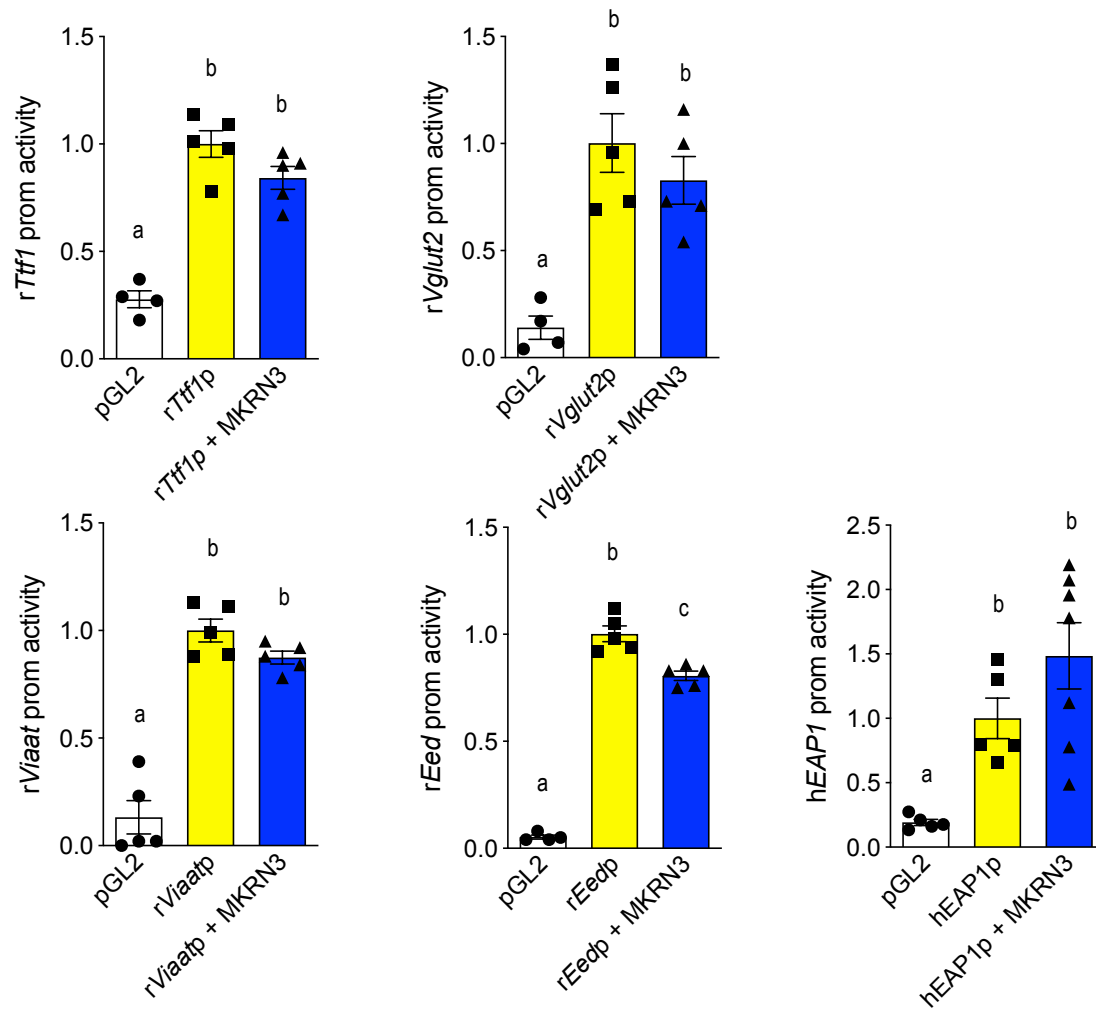

**Supplementary Figure 1: MKRN3 does not inhibit the promoter activity of genes other than *KISS1* and *TAC3* implicated in stimulatory and inhibitory control of GnRH regulation.** Lack of effect of MKRN3 on rat (*rTtf1*, *rVglut2*, *rViaat1*, *rEed*, and human (*hEAP1* promoter (p) activity. A small but significant inhibitory effect was observed on *rEed* promoter activity. Bars represent mean  $\pm$  SEM (n = 4-6), white bars represent empty vector pGL1, yellow bars represent genes tested in luciferase and blue bars represent MKRN3 co-transfected with respective genes promoters. Groups with different letters are statistically different (P < 0.05), as determined by one-way ANOVA followed by Student–Newman–Keuls test.

**Supplementary Figure 2**

**RACE PCR design**

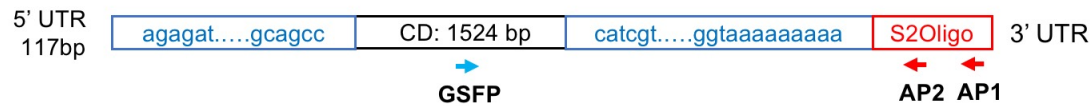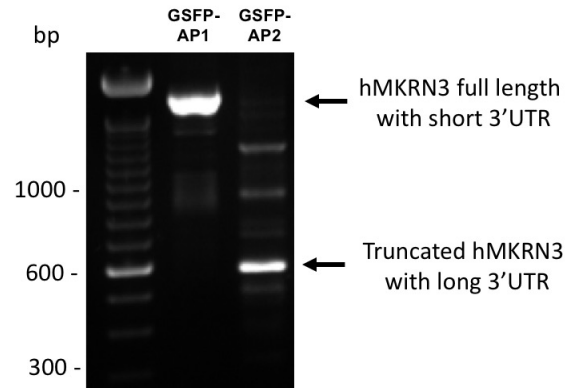

**Full length hMKRN3**

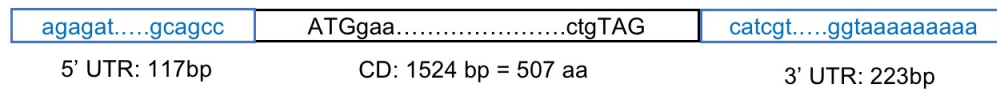

**Truncated hMKRN3**

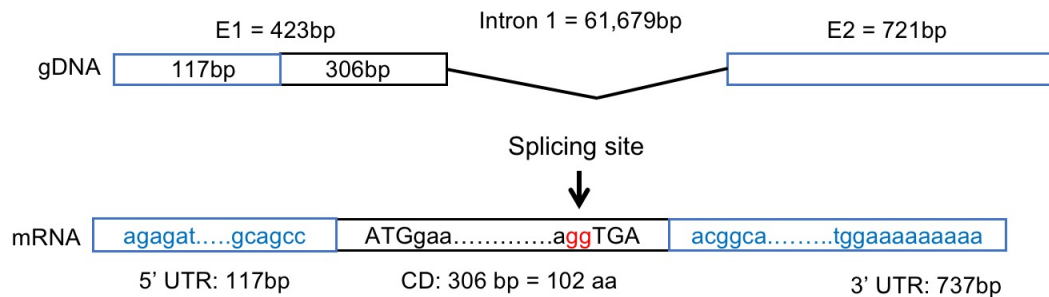

**Supplementary Figure 2: Identification of the *MKRN3* 3'-UTR in the human hypothalamus. (A) Structure of the *MKRN3* gene, 5'-UTR of 117 bp, coding domain (CD)**

of 1524 bp and 3'-UTR. A nested PCR protocol with a gene-specific forward primer (GSFP) and two reverse AP1 and AP2 primers from the SMART<sup>TM</sup> RACE kit were used to amplify the 3'-UTR from human hypothalamic total RNA. **(B)** Gel image depicting the PCR products derived from RACE nested PCR. Two main transcriptional variants were detected, a full length *MKRN3* transcript in round one (primers GSFP and AP1) of the nested PCR and a shorter (truncated) version on the second round of PCR (primers GSFP and AP2). **(C)** Representation of the full length and truncated versions of *MKRN3* as determined by Sanger sequencing of at least 10 different clones for each. Black boxes represent coding domains, black lines are introns, and untranslated regions are represented by blue boxes. Numbers indicate the size of the exons and introns (in bp). *E1* = Exon 1, *E2* = exon 2, gDNA = genomic DNA, mRNA = messenger RNA.
